# Supplementary material
Source: PubMed Central journal article supplement (PMC3265147)
Supplement: supp_blood-2009-02-206706_blood-2009-02-206706-1.pdf [file supp_blood-2009-02-206706_blood-2009-02-206706-1.pdf]

|   |         |                                                                 |
|---|---------|-----------------------------------------------------------------|
| A | BIRC1A1 | TTAAACTAGTAAGGAGATCAACATTTTCAAATTAGATGTTTCAACTGTGCTCTAAGCTTTTAA |
| A | BIRC1A2 | TTAAAAGCTTAGAGCACAGTTGAAACATCTAATTTGAAAATGTTGATCTCCTTACTAGTTTAA |
| A | BIRC1B1 | TTAAACTAGTAAGGAGATCAACATTTTCAAATTATATGTGTCAACTGTGCTCTAAGCTTTTAA |
| A | BIRC1B2 | TTAAAAGCTTAGAGCACAGTTGACACATATAATTTGAAAATGTTGATCTCCTTACTAGTTTAA |
| B | BIRC2A1 | TTAAACTAGTGCAGTGTCCCTTTTGCTAGAGCTGACAGCTTTGTTTCGCGTGGAAGCTTTTAA |
| B | BIRC2A2 | TTAAAAGCTTCCACGCGAACAAAGCTGTCAGCTCTAGCAAAAGGGACACTGCACTAGTTTAA  |
| B | BIRC2B1 | TTAAACTAGTGCAGTGTCCCTTTTGCTAGAGCTGACATCTGTGTTTCGCGTGGAAGCTTTTAA |
| B | BIRC2B2 | TTAAAAGCTTCCACGCGAACACAGATGTCAGCTCTAGCAAAAGGGACACTGCACTAGTTTAA  |
| C | 320F    | CCTCCCAAAGTGTGGGATTA                                            |
| C | 320R    | TTCTAGGTGGGGGAGATACCA                                           |
| C | 494F    | TCTTGACCACAGAATTCGAGA                                           |
| C | 494R    | TTGTGGAAGTCCAGGCCA                                              |

*Key:*

A: Primers for creation of 3'-end survivin target (for mir-494). BIRC1A1/2 creates an exact target, and BIRC1B1/2 a mismatched target.

B: Primers for 3' survivin target (for mir-320a) BIRC2A1/2 create an exact target and BISC2B1/2 a mismatch target.

C: Primer sequences for chromatin immunoprecipitation-PCR analysis.
